# Supplementary material
Source: PubMed Central journal article supplement (PMC10053778)
Supplement: ehp11587.s001.acco.pdf [file ehp11587.s001.acco.pdf]

**Note to readers with disabilities:** *EHP* strives to ensure that all journal content is accessible to all readers. However, some figures and Supplemental Material published in *EHP* articles may not conform to [508 standards](#) due to the complexity of the information being presented. If you need assistance accessing journal content, please contact [ehp508@niehs.nih.gov](mailto:ehp508@niehs.nih.gov). Our staff will work with you to assess and meet your accessibility needs within 3 working days.

### **Supplemental Material**

#### **Suicide and Transportation Noise: A Prospective Cohort Study from Switzerland**

Benedikt Wicki, Beat Schäffer, Jean Marc Wunderli, Thomas J. Müller, Charlotte Pervilhac, Martin Rösli, and Danielle Vienneau

#### **Table of Contents**

**Table S1.** Study Population Selection.

**Table S2.** Estimated HR per 10dB Lden / 10 $\mu$ g/m<sup>3</sup> PM<sub>2.5</sub> / 0.1 NDVI (95% confidence interval) for death by all intentional self-harm (ICD-10: X60-84, excluding X61.8, X61.9 and X81-82) from the different models.

**Table S3.** HR per 10dB Lden / 10 $\mu$ g/m<sup>3</sup> PM<sub>2.5</sub> / 0.1 NDVI (95% confidence interval) for the association death by specified suicide category, main model (M3).

**Table S4.** Association between eventfulness of noise at night and death from different methods of suicide. Model 4a and 4b, HR per quartile of night-time Intermittency Ratio and number of noise events (Lowest quartile as reference group).

**Table S5.** HR (95% confidence interval) for road traffic noise and PM<sub>2.5</sub> for death by all intentional self-harm (ICD-10: X60-84, excluding X61.8, X61.9 and X81-82) in categorical (quartiles) exposure models.

**Table S6.** Effect modification by Local SEP-Index, HR per 10dB Lden / 10 $\mu$ g/m<sup>3</sup> PM<sub>2.5</sub> / 0.1 NDVI (95% confidence interval).

**Table S7.** Effect modification by civil status, HR per 10dB Lden / 10 $\mu$ g/m<sup>3</sup> PM<sub>2.5</sub> / 0.1 NDVI (95% confidence interval).

**Table S8.** Effect modification by urbanization, HR per 10dB Lden / 10 $\mu$ g/m<sup>3</sup> PM<sub>2.5</sub> / 0.1 NDVI (95% confidence interval).

**Table S9.** HR and 95% Confidence interval at certain values of the exposure-response relationship for the association between transportation noise sources (Lden [dB]) and mortality from intentional self-harm (ICD-10: X60-84, excl. ICD-10 X61.8, X61.9, X81-82) displayed in Figure 2 in the main article.

**Figure S1.** HR and 95% CI for death by suicide involving vehicles per 10dB source-specific Lden.

**Figure S2.** Directed Acyclic Graph.

**Figure S3.** Correlation Matrix.

**Figure S4.** HR and 95% CI for death by specified suicide category per 10dB source-specific Lden.

**Figure S5.** HR and 95% CI for death by intentional self-harm per exposure to the number of transportation noise sources with exposure >50dB Lden.

**Figure S6.** Sensitivity Analysis comparing models adjusting for PM<sub>2.5</sub> (=Model 3) versus NO<sub>2</sub> (=Model 3b).

**Figure S7.** Association between air pollution and suicide, adjusted vs. unadjusted for source-specific transportation noise and greenspace.

**Figure S8.** Effect modification by sex: HR and 95% CI for death by specified suicide category per 10dB source-specific Lden.

**Figure S9.** Effect modification by age: HR and 95% CI for death by all intentional self-harm per 10dB source-specific Lden.

**Figure S10.** Effect modification by local-SEP category: HR and 95% CI for death by all intentional self-harm per 10dB source-specific Lden.

**Figure S11.** Effect modification by degree of urban: HR and 95% CI for death by all intentional self-harm per 10dB source-specific Lden / 10µg/m<sup>3</sup> PM<sub>2.5</sub> / 0.1 NDVI.

**Supplement Table S1 – Study Population Selection**

| <b>Description</b>                                                                      | <b>N</b>  | <b>% total</b> | <b>% dropped</b> | <b>Notes</b>                                                          |
|-----------------------------------------------------------------------------------------|-----------|----------------|------------------|-----------------------------------------------------------------------|
| Baseline (in cohort 04.12.2000)                                                         | 7'280'246 | 100            | 0                | Full population (original sample)                                     |
| Not matched between old and new SNC                                                     | 6'680'907 | 91.8           | 8.2              | Inconsistent data: Mismatch in probabilistic linkage 2000-2010 (lost) |
| Keep persons 15+                                                                        | 5'512'145 | 100            | 15.9             | Starting point (24.3% dropped from full population baseline)          |
| Exclude those who die or emigrate before 01.01.2001 (in the 4 weeks since census start) | 5'505'715 | 99.9           | 0.1              |                                                                       |
| Exclude invalid xy coordinates & household ID                                           | 5'359'204 | 97.2           | 2.7              |                                                                       |
| Exclude housing type = hotels, hospitals, old persons homes                             | 5'212'487 | 94.6           | 2.7              |                                                                       |
| Exclude imputed deaths in original SNC                                                  | 5'212'487 | 94.6           | 0.0              |                                                                       |
| Exclude Education = child or unknown for those over 20 years                            | 5'087'501 | 92.3           | 2.4              |                                                                       |
| Exclude unknown Local-SEP index                                                         | 5'084'838 | 92.2           | 0.1              |                                                                       |

**Supplemental Table S2 – Estimated HR per 10dB Lden / 10µg/m<sup>3</sup> PM<sub>2.5</sub> / 0.1 NDVI (95% confidence interval) for death by all intentional self-harm (ICD-10: X60-84, excluding X61.8, X61.9 and X81-82) from the different models**

|                         | <b>Model 0</b>          | <b>Model 1</b>          | <b>Model 2</b>          | <b>Model 3<br/>(Main Model)</b> |
|-------------------------|-------------------------|-------------------------|-------------------------|---------------------------------|
| <b>Road traffic</b>     | 1.058<br>(1.034, 1.082) | 1.039<br>(1.015, 1.063) | 1.037<br>(1.013, 1.061) | 1.040<br>(1.015, 1.065)         |
| <b>Railway</b>          | 1.017<br>(0.999, 1.034) | 1.021<br>(1.004, 1.039) | 1.021<br>(1.003, 1.039) | 1.022<br>(1.004, 1.041)         |
| <b>Aircraft</b>         | 0.978<br>(0.954, 1.003) | 1.003<br>(0.976, 1.029) | 0.993<br>(0.962, 1.025) | 0.997<br>(0.965, 1.029)         |
| <b>PM<sub>2.5</sub></b> |                         |                         |                         | 0.900<br>(0.811, 0.998)         |
| <b>NDVI</b>             |                         |                         |                         | 0.999<br>(0.978, 1.02)          |

*Model 0= road traffic, railway or aircraft noise (other two noise sources included as adjustment), age as timescale, sex as strata*

*Model 1= Model 0 + individual level covariates (mother tongue, nationality, civil status, education, urbanization, local-SEP)*

*Model 2= Model 1 + area level covariates (community and regional-SEP and unemployment rate)*

*Model 3 = Model 2 + air pollution (PM<sub>2.5</sub>) + greenness in a 500m buffer around residence (NDVI)*

**Supplemental Table S3 –HR per 10dB Lden / 10µg/m<sup>3</sup> PM<sub>2.5</sub> / 0.1 NDVI (95% confidence interval) for the association death by specified suicide category, main model (M3)**

|                         | <b>All intentional self-harm (ICD-10: X60-84, excluding X61.8, X61.9 and X81-82)</b> |                          |                            |                                |                                   |                                |
|-------------------------|--------------------------------------------------------------------------------------|--------------------------|----------------------------|--------------------------------|-----------------------------------|--------------------------------|
|                         | <b>All<br/>(N=11'265)</b>                                                            | <b>Male<br/>(N=8476)</b> | <b>Female<br/>(N=2789)</b> | <b>Age 15-30<br/>(N= 1508)</b> | <b>Age &gt;30-65<br/>(N=7240)</b> | <b>Age &gt;65<br/>(N=2517)</b> |
| <b>Road traffic</b>     | 1.040<br>(1.015, 1.065)                                                              | 1.034<br>(1.006, 1.063)  | 1.058<br>(1.007, 1.112)    | 1.079<br>(1.011, 1.152)        | 1.050<br>(1.019, 1.082)           | 0.994<br>(0.944, 1.047)        |
| <b>Railway</b>          | 1.022<br>(1.004, 1.041)                                                              | 1.021<br>(1.000, 1.043)  | 1.028<br>(0.992, 1.066)    | 0.982<br>(0.934, 1.032)        | 1.027<br>(1.004, 1.051)           | 1.037<br>(0.998, 1.077)        |
| <b>Aircraft</b>         | 0.997<br>(0.965, 1.029)                                                              | 0.995<br>(0.959, 1.032)  | 1.005<br>(0.943, 1.071)    | 0.983<br>(0.901, 1.072)        | 1.015<br>(0.976, 1.056)           | 0.95<br>(0.887, 1.017)         |
| <b>PM<sub>2.5</sub></b> | 0.900<br>(0.811, 0.998)                                                              | 0.899<br>(0.798, 1.012)  | 0.918<br>(0.740, 1.137)    | 0.978<br>(0.734, 1.303)        | 0.882<br>(0.776, 1.002)           | 0.915<br>(0.729, 1.149)        |
| <b>NDVI</b>             | 0.999<br>(0.978, 1.020)                                                              | 1.016<br>(0.992, 1.041)  | 0.946<br>(0.908, 0.986)    | 1.002<br>(0.948, 1.058)        | 0.986<br>(0.961, 1.012)           | 1.036<br>(0.991, 1.084)        |
|                         | <b>Poisoning (X60-69)</b>                                                            |                          |                            |                                |                                   |                                |
|                         | <b>All<br/>(N=1176)</b>                                                              | <b>Male<br/>(N=676)</b>  | <b>Female<br/>(N=500)</b>  | <b>Age 15-30<br/>(N= 168)</b>  | <b>Age &gt;30-65<br/>(N=834)</b>  | <b>Age &gt;65<br/>(N=174)</b>  |
| <b>Road traffic</b>     | 1.106<br>(1.025, 1.193)                                                              | 1.106<br>(1.002, 1.221)  | 1.104<br>(0.982, 1.241)    | 1.165<br>(0.956, 1.421)        | 1.127<br>(1.030, 1.232)           | 0.965<br>(0.789, 1.179)        |
| <b>Railway</b>          | 1.053<br>(0.997, 1.111)                                                              | 1.050<br>(0.978, 1.127)  | 1.059<br>(0.975, 1.15)     | 1.018<br>(0.883, 1.173)        | 1.062<br>(0.996, 1.132)           | 1.045<br>(0.907, 1.205)        |
| <b>Aircraft</b>         | 0.994<br>(0.902, 1.094)                                                              | 1.038<br>(0.916, 1.177)  | 0.932<br>(0.801, 1.084)    | 1.085<br>(0.848, 1.388)        | 0.993<br>(0.885, 1.115)           | 0.912<br>(0.708, 1.174)        |
| <b>PM<sub>2.5</sub></b> | 0.943<br>(0.671, 1.324)                                                              | 1.067<br>(0.689, 1.653)  | 0.787<br>(0.459, 1.349)    | 0.956<br>(0.394, 2.323)        | 0.991<br>(0.663, 1.480)           | 0.742<br>(0.297, 1.854)        |
| <b>NDVI</b>             | 0.923<br>(0.868, 0.982)                                                              | 0.961<br>(0.886, 1.044)  | 0.874<br>(0.795, 0.96)     | 0.900<br>(0.766, 1.057)        | 0.931<br>(0.865, 1.002)           | 0.904<br>(0.769, 1.064)        |
|                         | <b>Hanging (X70)</b>                                                                 |                          |                            |                                |                                   |                                |
|                         | <b>All<br/>(N=3755)</b>                                                              | <b>Male<br/>(N=2922)</b> | <b>Female<br/>(N=833)</b>  | <b>Age 15-30<br/>(N= 471)</b>  | <b>Age &gt;30-65<br/>(N=2561)</b> | <b>Age &gt;65<br/>(N=723)</b>  |
| <b>Road traffic</b>     | 1.060<br>(1.017, 1.105)                                                              | 1.062<br>(1.013, 1.113)  | 1.055<br>(0.964, 1.154)    | 1.144<br>(1.019, 1.285)        | 1.073<br>(1.020, 1.128)           | 0.970<br>(0.883, 1.066)        |
| <b>Railway</b>          | 1.006<br>(0.974, 1.039)                                                              | 1.016<br>(0.980, 1.053)  | 0.970<br>(0.905, 1.04)     | 0.940<br>(0.857, 1.031)        | 1.022<br>(0.984, 1.062)           | 0.993<br>(0.922, 1.070)        |
| <b>Aircraft</b>         | 0.970<br>(0.917, 1.027)                                                              | 0.956<br>(0.896, 1.019)  | 1.017<br>(0.906, 1.142)    | 0.923<br>(0.785, 1.086)        | 1.019<br>(0.954, 1.089)           | 0.823<br>(0.714, 0.949)        |
| <b>PM<sub>2.5</sub></b> | 0.913<br>(0.767, 1.086)                                                              | 0.850<br>(0.699, 1.033)  | 1.205<br>(0.819, 1.771)    | 0.961<br>(0.581, 1.590)        | 0.931<br>(0.754, 1.149)           | 0.847<br>(0.572, 1.254)        |
| <b>NDVI</b>             | 1.042<br>(1.005, 1.081)                                                              | 1.055<br>(1.012, 1.098)  | 0.999<br>(0.924, 1.080)    | 1.099<br>(0.994, 1.214)        | 1.026<br>(0.982, 1.072)           | 1.063<br>(0.977, 1.156)        |
|                         | <b>Guns (X72-75)</b>                                                                 |                          |                            |                                |                                   |                                |
|                         | <b>All<br/>(N=3236)</b>                                                              | <b>Male<br/>(N=3106)</b> | <b>Female<br/>(N=130)</b>  | <b>Age 15-30<br/>(N= 455)</b>  | <b>Age &gt;30-65<br/>(N=1985)</b> | <b>Age &gt;65<br/>(N=796)</b>  |
| <b>Road traffic</b>     | 1.009<br>(0.964, 1.055)                                                              | 1.001<br>(0.956, 1.048)  | 1.220<br>(0.972, 1.532)    | 1.042<br>(0.925, 1.174)        | 1.018<br>(0.962, 1.078)           | 0.970<br>(0.885, 1.063)        |
| <b>Railway</b>          | 1.015<br>(0.980, 1.051)                                                              | 1.012<br>(0.977, 1.049)  | 1.072<br>(0.912, 1.259)    | 0.994<br>(0.908, 1.089)        | 1.012<br>(0.968, 1.058)           | 1.040<br>(0.970, 1.115)        |
| <b>Aircraft</b>         | 0.991<br>(0.935, 1.051)                                                              | 0.986<br>(0.929, 1.048)  | 1.100<br>(0.836, 1.447)    | 0.959<br>(0.819, 1.124)        | 1.001<br>(0.929, 1.079)           | 0.979<br>(0.870, 1.102)        |
| <b>PM<sub>2.5</sub></b> | 0.906<br>(0.745, 1.101)                                                              | 0.891<br>(0.730, 1.087)  | 1.404<br>(0.515, 3.824)    | 0.957<br>(0.568, 1.612)        | 0.943<br>(0.739, 1.204)           | 0.781<br>(0.515, 1.184)        |
| <b>NDVI</b>             | 1.048<br>(1.007, 1.091)                                                              | 1.050<br>(1.007, 1.094)  | 1.005<br>(0.825, 1.225)    | 0.963<br>(0.868, 1.068)        | 1.036<br>(0.984, 1.090)           | 1.141<br>(1.050, 1.241)        |
|                         | <b>Jumping (X80)</b>                                                                 |                          |                            |                                |                                   |                                |
|                         | <b>All<br/>(N=1651)</b>                                                              | <b>Male<br/>(N=949)</b>  | <b>Female<br/>(N=702)</b>  | <b>Age 15-30<br/>(N= 281)</b>  | <b>Age &gt;30-65<br/>(N=939)</b>  | <b>Age &gt;65<br/>(N=431)</b>  |

|                         |                         |                         |                         |                         |                         |                         |
|-------------------------|-------------------------|-------------------------|-------------------------|-------------------------|-------------------------|-------------------------|
| <b>Road traffic</b>     | 1.046<br>(0.981, 1.115) | 1.026<br>(0.943, 1.116) | 1.073<br>(0.972, 1.184) | 0.994<br>(0.853, 1.159) | 1.049<br>(0.964, 1.142) | 1.080<br>(0.951, 1.227) |
| <b>Railway</b>          | 1.002<br>(0.956, 1.050) | 1.005<br>(0.945, 1.068) | 0.998<br>(0.928, 1.073) | 1.011<br>(0.904, 1.131) | 0.970<br>(0.910, 1.034) | 1.067<br>(0.978, 1.165) |
| <b>Aircraft</b>         | 1.057<br>(0.974, 1.147) | 1.065<br>(0.957, 1.185) | 1.044<br>(0.918, 1.186) | 0.952<br>(0.777, 1.166) | 1.029<br>(0.921, 1.151) | 1.167<br>(1.002, 1.360) |
| <b>PM<sub>2.5</sub></b> | 0.783<br>(0.592, 1.037) | 0.937<br>(0.647, 1.357) | 0.621<br>(0.404, 0.955) | 0.929<br>(0.477, 1.810) | 0.573<br>(0.398, 0.826) | 1.587<br>(0.894, 2.819) |
| <b>NDVI</b>             | 0.921<br>(0.874, 0.969) | 0.903<br>(0.844, 0.967) | 0.946<br>(0.874, 1.024) | 0.967<br>(0.856, 1.094) | 0.902<br>(0.843, 0.966) | 0.928<br>(0.836, 1.030) |

*Results from main model (M3) including noise exposures (road traffic noise, railway noise and aircraft noise, as Lden), PM<sub>2.5</sub> exposure, NDVI, age as timescale, sex as strata, individual level covariates (civil status, education, mother tongue, nationality, urbanization, local-SEP) and area-SEP and unemployment rate.*

**Supplemental Table S4: Association between eventfulness of noise at night and death from different methods of suicide. Model 4a and 4b, HR per quartile of night-time Intermittency Ratio and number of noise events (Lowest quartile as reference group)**

|                                               | <b>All intentional self-harm (ICD-10: X60-84, excluding X61.8, X61.9 and X81-82)</b><br><br>(N=11'265) | <b>Poisoning (X60-69)</b><br><br>All (N=1176) | <b>Hanging (X70)</b><br><br>All (N=3755) | <b>Firearms (X72-75)</b><br><br>All (N=3236) | <b>Jumping (X80)</b><br><br>All (N=1651) |
|-----------------------------------------------|--------------------------------------------------------------------------------------------------------|-----------------------------------------------|------------------------------------------|----------------------------------------------|------------------------------------------|
| <b>Model 4a: Intermittency Ratio at night</b> |                                                                                                        |                                               |                                          |                                              |                                          |
| <b>Q2</b><br>(58.0 – 74.6)                    | 1.000<br>(0.949, 1.054)                                                                                | 0.911<br>(0.777, 1.067)                       | 1.002<br>(0.914, 1.099)                  | 1.019<br>(0.922, 1.126)                      | 0.996<br>(0.871, 1.139)                  |
| <b>Q3</b><br>(74.7 – 85.1)                    | 0.994<br>(0.942, 1.048)                                                                                | 0.782<br>(0.661, 0.925)                       | 1.016<br>(0.926, 1.114)                  | 1.007<br>(0.911, 1.114)                      | 1.003<br>(0.875, 1.150)                  |
| <b>Q4</b><br>(85.2 – 100)                     | 0.964<br>(0.912, 1.019)                                                                                | 0.932<br>(0.788, 1.103)                       | 0.946<br>(0.859, 1.042)                  | 1.007<br>(0.908, 1.116)                      | 0.891<br>(0.768, 1.032)                  |
| <b>Model 4b: Number of Events at night</b>    |                                                                                                        |                                               |                                          |                                              |                                          |
| <b>Q2</b><br>(52.6-110.3)                     | 1.004<br>(0.952, 1.058)                                                                                | 0.881<br>(0.744, 1.043)                       | 1.028<br>(0.937, 1.128)                  | 1.013<br>(0.921, 1.114)                      | 1.047<br>(0.910, 1.206)                  |
| <b>Q3</b><br>(110.4 – 220.1)                  | 0.978<br>(0.925, 1.034)                                                                                | 0.878<br>(0.737, 1.047)                       | 1.034<br>(0.938, 1.139)                  | 0.937<br>(0.845, 1.038)                      | 1.003<br>(0.866, 1.163)                  |
| <b>Q4</b><br>(220.1 – 13110.2)                | 0.987<br>(0.923, 1.056)                                                                                | 0.915<br>(0.744, 1.126)                       | 1.131<br>(1.006, 1.270)                  | 0.957<br>(0.844, 1.086)                      | 0.823<br>(0.688, 0.985)                  |

*M4a: quartiles of night-time intermittency ratio (IR) from all transportation sources combined as exposure (Q1 (0 – 57.9) as reference), Lden from Road Traffic, Railway and Aircraft Noise, PM<sub>2.5</sub> exposure, NDVI, age as timescale, sex as strata, individual level covariates (civil status, education, mother tongue, nationality, urbanization, local-SEP) and area-SEP and unemployment rate.*

*M4b: quartiles of night-time number of noise events from all sources combined as exposure (Q1 (0 – 52.5) as reference), Lden from Road Traffic, Railway and Aircraft Noise, PM<sub>2.5</sub> exposure, NDVI, age as timescale, sex as strata, individual level covariates (civil status, education, mother tongue, nationality, urbanization, local-SEP) and area-SEP and unemployment rate.*

**Supplemental Table S5 –HR (95% confidence interval) for road traffic noise and PM<sub>2.5</sub> for death by all intentional self-harm (ICD-10: X60-84, excluding X61.8, X61.9 and X81-82) in categorical (quartiles) exposure models**

|                        |                                            | Road Traffic Noise Quartiles      |                                       |                                       |                                       |
|------------------------|--------------------------------------------|-----------------------------------|---------------------------------------|---------------------------------------|---------------------------------------|
|                        |                                            | Q1<br>35-48.8 dB L <sub>den</sub> | Q2<br>48.8 – 53.9 dB L <sub>den</sub> | Q3<br>53.9 – 60.2 dB L <sub>den</sub> | Q4<br>60.2 – 88.2 dB L <sub>den</sub> |
| <b>PM2.5 Quartiles</b> | <b>Q1</b><br>0.4 – 14.8 µg/m <sup>3</sup>  | 1 (=reference)                    | 1.084<br>(0.988, 1.190)               | 0.990<br>(0.895, 1.096)               | 1.034<br>(0.930, 1.148)               |
|                        | <b>Q2</b><br>14.8 – 16.2 µg/m <sup>3</sup> | 0.906<br>(0.821, 1.000)           | 1.035<br>(0.901, 1.190)               | 1.160<br>(1.002, 1.341)               | 1.113<br>(0.957, 1.295)               |
|                        | <b>Q3</b><br>16.2 - 17.4 µg/m <sup>3</sup> | 0.971<br>(0.873, 1.080)           | 0.938<br>(0.812, 1.083)               | 1.104<br>(0.953, 1.279)               | 1.001<br>(0.860, 1.165)               |
|                        | <b>Q4</b><br>17.4 – 28.0 µg/m <sup>3</sup> | 0.914<br>(0.803, 1.042)           | 0.978<br>(0.830, 1.152)               | 1.082<br>(0.919, 1.273)               | 1.141<br>(0.972, 1.341)               |

*Categorical exposure model: Adjusted for railway and aircraft noise, NDVI, age as timescale, sex as strata, individual level covariates (civil status, education, mother tongue, nationality, urbanization, local-SEP) and area-SEP and unemployment rate.*



**Supplemental Table S6 – Effect modification by Local SEP-Index, HR per 10dB Lden / 10µg/m<sup>3</sup> PM<sub>2.5</sub> / 0.1 NDVI (95% confidence interval)**

|                         | Local SEP-Index            |                                |                                |                              |
|-------------------------|----------------------------|--------------------------------|--------------------------------|------------------------------|
|                         | Q1 (0 – 55.96)<br>(N=2908) | Q2 (55.97 – 63.15)<br>(N=2884) | Q3 (63.16 – 70.42)<br>(N=2831) | Q4 (70.43 – 100)<br>(N=2642) |
| <b>Road traffic</b>     | 1.020<br>(0.974, 1.069)    | 1.085<br>(1.035, 1.138)        | 1.015<br>(0.967, 1.066)        | 1.040<br>(0.987, 1.095)      |
| <b>Railway</b>          | 1.020<br>(0.986, 1.055)    | 1.015<br>(0.980, 1.052)        | 1.033<br>(0.996, 1.071)        | 1.026<br>(0.985, 1.069)      |
| <b>Aircraft</b>         | 1.031<br>(0.963, 1.103)    | 0.994<br>(0.928, 1.065)        | 0.997<br>(0.936, 1.062)        | 0.974<br>(0.918, 1.034)      |
| <b>PM<sub>2.5</sub></b> | 0.908<br>(0.765, 1.077)    | 0.911<br>(0.754, 1.101)        | 0.980<br>(0.781, 1.229)        | 0.782<br>(0.568, 1.078)      |
| <b>NDVI</b>             | 1.009<br>(0.970, 1.050)    | 1.020<br>(0.979, 1.063)        | 0.976<br>(0.936, 1.018)        | 0.983<br>(0.941, 1.027)      |

*Stratified analysis by Local SEP-Index Quartiles using the main model (M3) including noise exposures (road traffic noise, railway noise and aircraft noise, as Lden), PM<sub>2.5</sub> exposure, NDVI, age as timescale, sex as strata, individual level covariates (civil status, education, mother tongue, nationality, urbanization) and area-SEP and unemployment rate.*

**Supplemental Table S7 – Effect modification by civil status, HR per 10dB Lden / 10µg/m<sup>3</sup> PM<sub>2.5</sub> / 0.1 NDVI (95% confidence interval)**

|                         | Civil Status                                  |                         |
|-------------------------|-----------------------------------------------|-------------------------|
|                         | Single /<br>Divorced /<br>Widowed<br>(N=5622) | Married<br>(N=5643)     |
| <b>Road traffic</b>     | 1.048<br>(1.013, 1.084)                       | 1.033<br>(0.998, 1.069) |
| <b>Railway</b>          | 1.017<br>(0.992, 1.044)                       | 1.028<br>(1.001, 1.055) |
| <b>Aircraft</b>         | 0.993<br>(0.949, 1.040)                       | 1.000<br>(0.956, 1.045) |
| <b>PM<sub>2.5</sub></b> | 0.957<br>(0.823, 1.113)                       | 0.850<br>(0.737, 0.982) |
| <b>NDVI</b>             | 0.997<br>(0.970, 1.026)                       | 1.007<br>(0.976, 1.038) |

*Stratified analysis by civil status (single, divorced or widowed vs. married) using the main model (M3) including noise exposures (road traffic noise, railway noise and aircraft noise, as Lden), PM<sub>2.5</sub> exposure, NDVI, age as timescale, sex as strata, individual level covariates (education, mother tongue, nationality, urbanization, local-SEP) and area-SEP and unemployment rate.*

**Supplemental Table S8 – Effect modification by urbanization, HR per 10dB Lden / 10µg/m<sup>3</sup> PM<sub>2.5</sub> / 0.1 NDVI (95% confidence interval)**

|                         | Urbanization            |                         |                         |
|-------------------------|-------------------------|-------------------------|-------------------------|
|                         | Urban<br>(N=3406)       | Peri-Urban<br>(N=4643)  | Rural<br>(N=3216)       |
| <b>Road traffic</b>     | 1.050<br>(1.004, 1.098) | 1.045<br>(1.005, 1.087) | 1.022<br>(0.979, 1.066) |
| <b>Railway</b>          | 1.018<br>(0.986, 1.051) | 1.043<br>(1.014, 1.072) | 1.009<br>(0.972, 1.048) |
| <b>Aircraft</b>         | 0.975<br>(0.908, 1.047) | 1.025<br>(0.983, 1.068) | 0.962<br>(0.882, 1.049) |
| <b>PM<sub>2.5</sub></b> | 1.210<br>(0.966, 1.516) | 0.884<br>(0.741, 1.055) | 0.856<br>(0.727, 1.008) |
| <b>NDVI</b>             | 0.942<br>(0.912, 0.973) | 1.010<br>(0.974, 1.048) | 1.072<br>(1.027, 1.119) |

*Stratified analysis by degree of urban (urban, peri-urban, rural) using the main model (M3) including noise exposures (road traffic noise, railway noise and aircraft noise, as Lden), PM<sub>2.5</sub> exposure, NDVI, age as timescale, sex as strata, individual level covariates (education, mother tongue, nationality, local-SEP) and area-SEP and unemployment rate.*

**Supplemental Table S9a-c – HR and 95% Confidence interval at certain values of the exposure-response relationship for the association between transportation noise sources (Lden [dB]) and mortality from intentional self-harm (ICD-10: X60-84, excl. ICD-10 X61.8, X61.9, X81-82) displayed in Figure 2 in the main article**

**Supplemental Table S9a – Road traffic noise**

|                 | 35dB           | 40dB           | 50dB           | 60dB           | 70dB           | 75dB           |
|-----------------|----------------|----------------|----------------|----------------|----------------|----------------|
| <b>HR</b>       | 1.084          | 1.038          | 1.002          | 1.075          | 1.133          | 1.150          |
| <b>(95% CI)</b> | (0.986, 1.192) | (0.987, 1.091) | (0.979, 1.025) | (1.047, 1.104) | (1.068, 1.201) | (1.021, 1.294) |

**Supplemental Table S9b – Railway noise**

|                 | 30dB           | 40dB           | 50dB           | 60dB           | 70dB           | 80dB           |
|-----------------|----------------|----------------|----------------|----------------|----------------|----------------|
| <b>HR</b>       | 1.000          | 1.019          | 1.041          | 1.067          | 1.097          | 1.129          |
| <b>(95% CI)</b> | (0.982, 1.018) | (0.997, 1.041) | (1.009, 1.075) | (1.025, 1.111) | (1.011, 1.189) | (0.976, 1.304) |

**Supplemental Table S9c – Aircraft noise**

|                 | 30dB           | 35dB           | 40dB           | 45dB           | 50dB           | 55dB           |
|-----------------|----------------|----------------|----------------|----------------|----------------|----------------|
| <b>HR</b>       | 1.045          | 1.014          | 1.001          | 1.004          | 1.021          | 1.051          |
| <b>(95% CI)</b> | (1.027, 1.063) | (0.991, 1.037) | (0.962, 1.041) | (0.960, 1.049) | (0.972, 1.073) | (0.980, 1.127) |

*Numerical values of exposure-response relationship for the association between road traffic, railway or aircraft noise (Lden, dB) and mortality from all intentional self-harm (ICD-10: X60-84, excl. ICD-10 X61.8, X61.9, X81-82) calculated using natural splines (3 df, knots placed at tertiles of noise distribution). Results from main model (M3) including noise exposures (road traffic noise, railway noise and aircraft noise), PM<sub>2.5</sub> exposure, greenness (NDVI) within 500m around the residence, age as timescale, sex as strata, individual sociodemographic covariates (civil status, education, mother tongue, nationality, urbanization, local-SEP) and area-SEP and unemployment rate were used as base.*

*As reference for HR calculation (HR=1.000) minimum risk noise levels were used (Road traffic noise: 48.2dB, Railway noise: 30dB, Aircraft noise: 41.4dB)*

**Supplemental Figure S1 – HR and 95% CI for death by suicide involving vehicles per 10dB source-specific Lden**

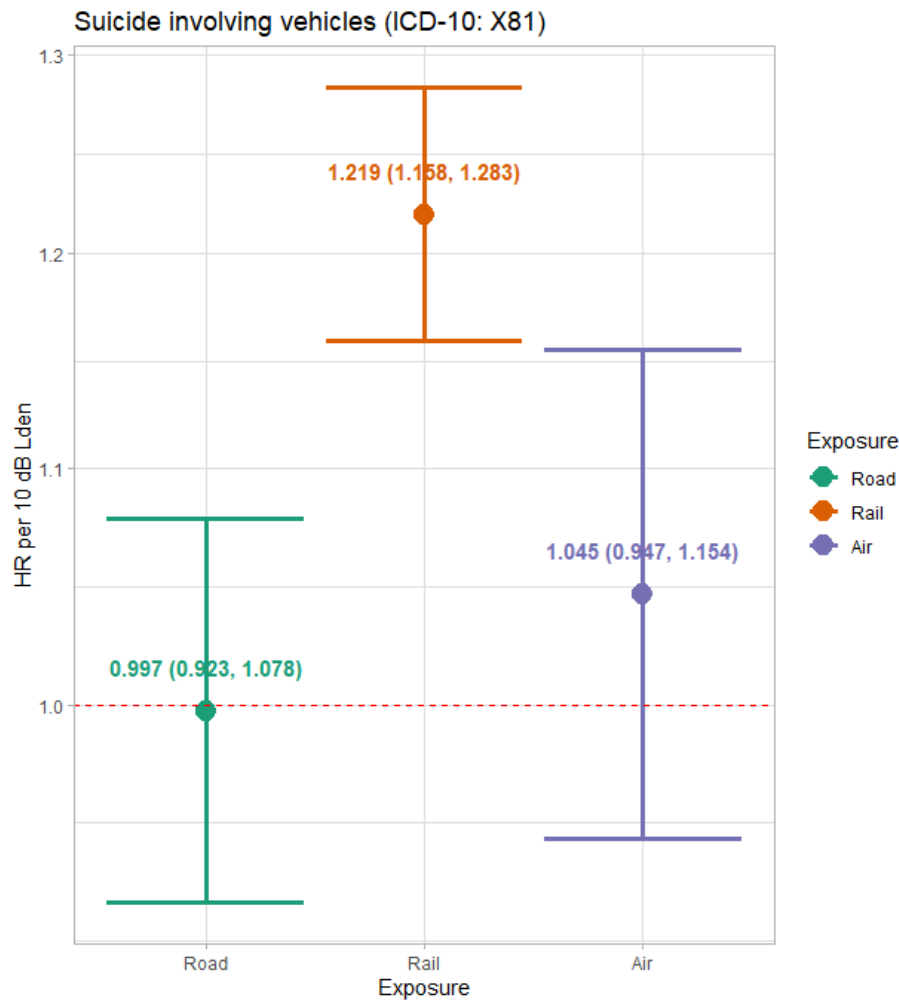

Results from preliminary analysis of an association of suicides involving vehicles and the three different noise sources using Model 3

Model 3 = Lden road traffic, railway or aircraft noise (other two noise sources included as adjustment), PM<sub>2.5</sub>, NDVI, age as a timescale, sex as strata + individual level covariates (mother tongue, nationality, civil status, education, urbanization, local-SEP) + area level covariates (community and regional-SEP and unemployment rate) Dots mark HR per 10dB source-specific Lden, whiskers the corresponding 95%CI

**Supplemental Figure S2 – Directed Acyclic Graph**

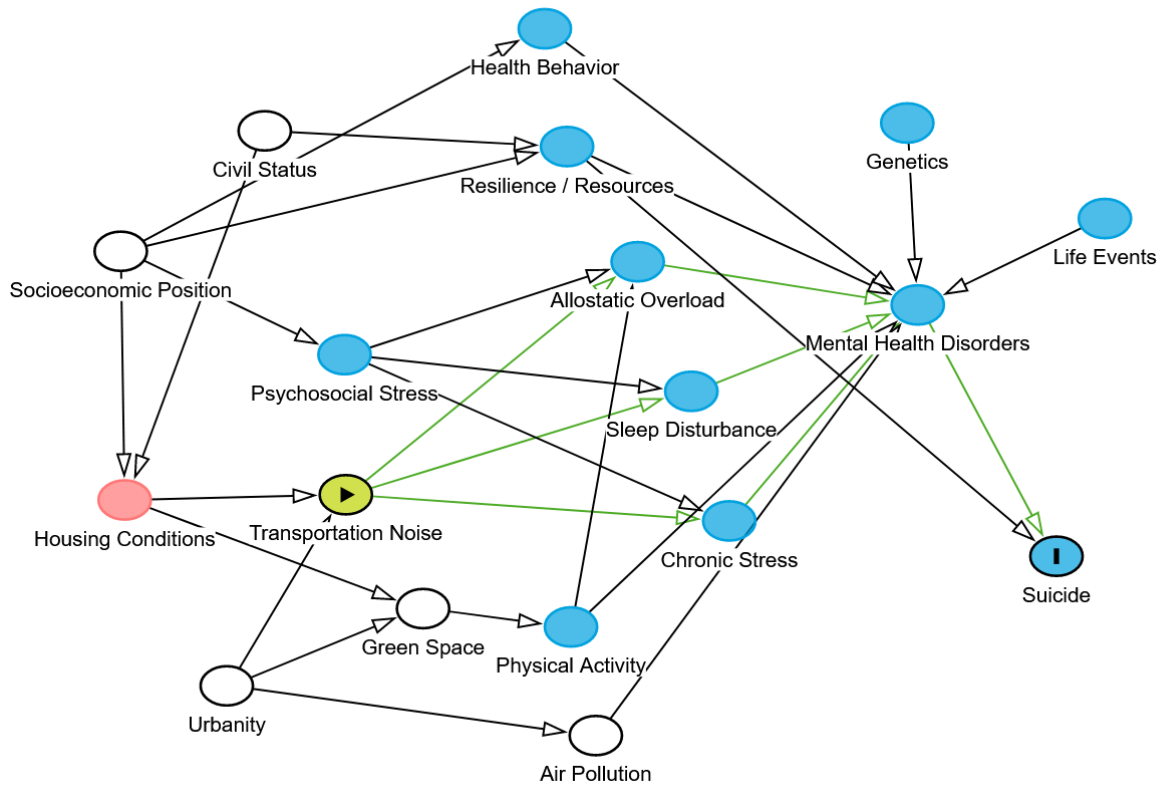

*DAG (Directed Acyclic Graph) for the association between transportation noise exposure and suicide. Nodes indicate factors/variables, arrows a causal effect of one variable on the other. Green arrows indicate the causal pathway. Red arrows would indicate confounding paths (here, none). Blue nodes indicate unmeasured covariates which are no confounders. White nodes indicate controlled for confounders. Red node indicates an unmeasured, potential confounder (which here is indirectly controlled for).*

### Supplemental Figure S3 – Correlation Matrix

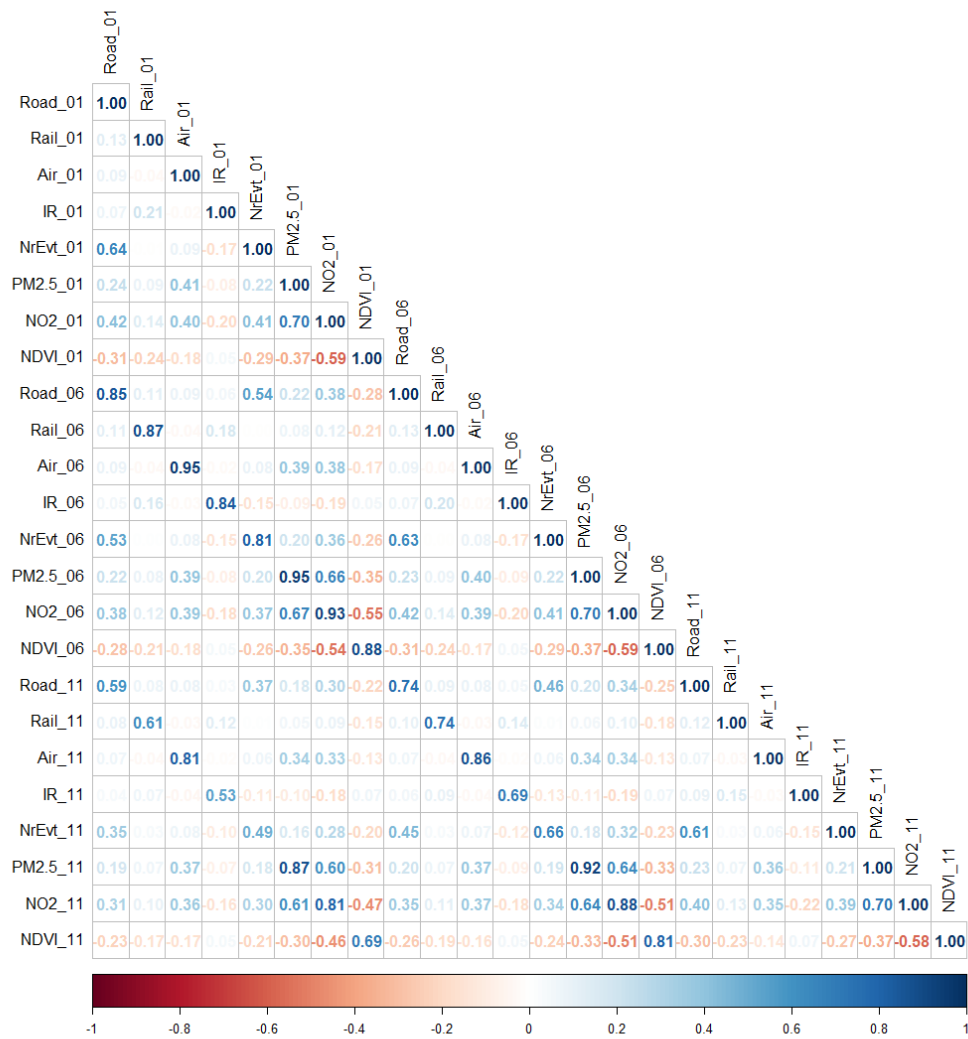

Numbers indicate Pearson coefficient.

Notes: Road = road traffic noise ( $L_{den}$  [dB]), Rail = railway noise ( $L_{den}$  [dB]), Air = aircraft noise ( $L_{den}$  [dB]), IR = Intermittency ratio at night, NrEvt = number of noise events at night, NDVI = normalized difference vegetation index, PM2.5 = PM2.5 [ $\mu\text{g}/\text{m}^3$ ], NO2 = NO<sub>2</sub> [ $\mu\text{g}/\text{m}^3$ ], 01, 06 and 11 respectively refer to years 2001, 2006 and 2011

**Supplemental Figure S4 – HR and 95% CI for death by specified suicide category per 10dB source-specific Lden**

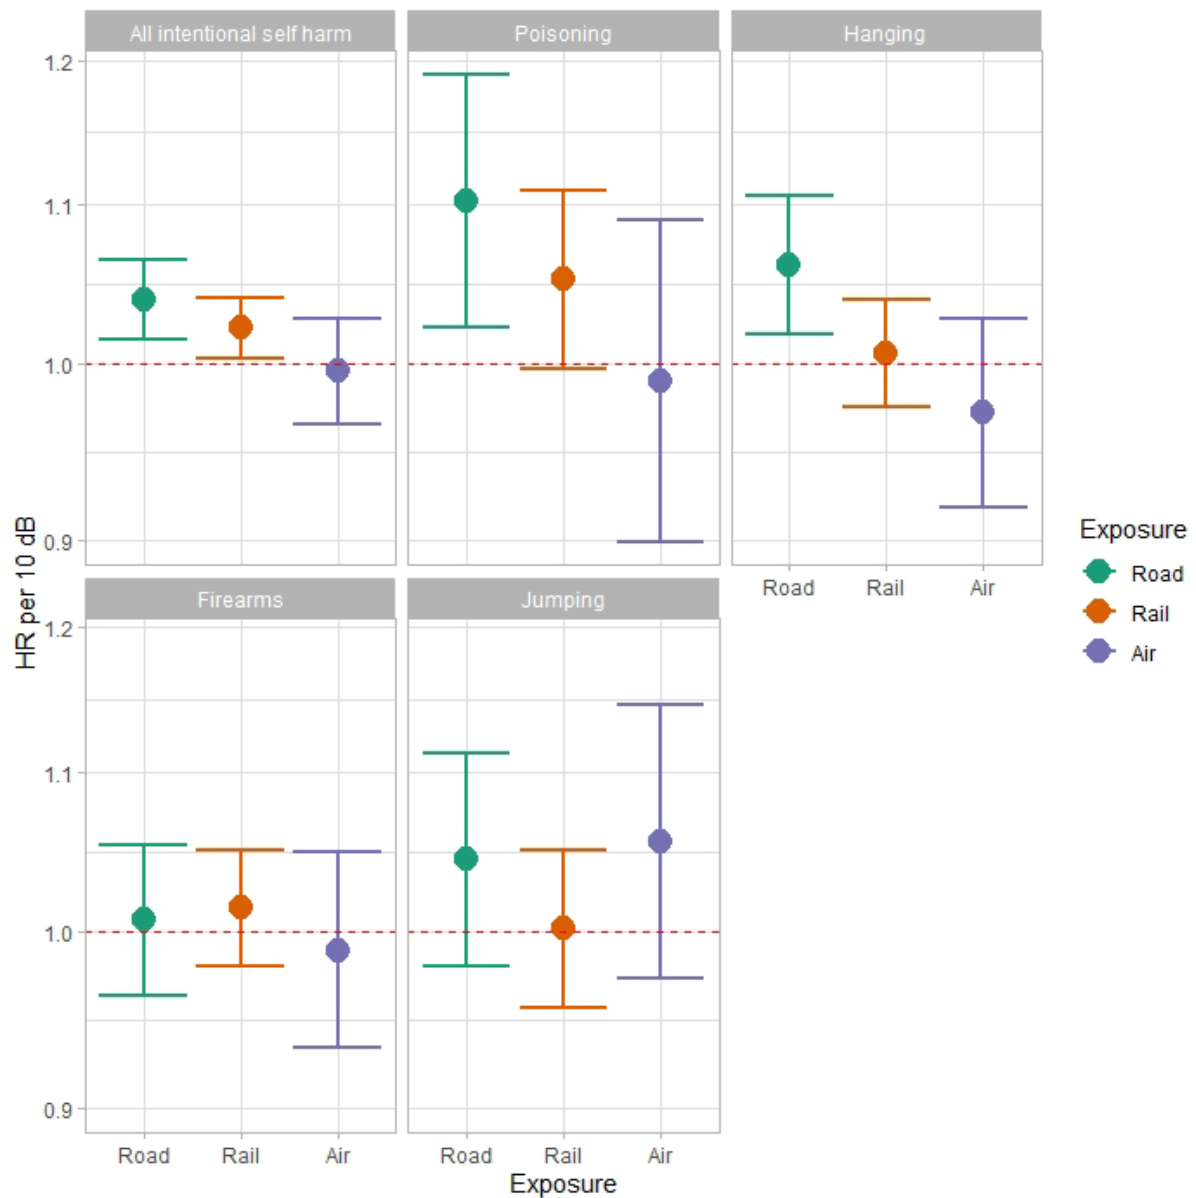

Results from main model (M3): Lden road traffic, railway or aircraft noise (other two noise sources included as adjustment),  $PM_{2.5}$ , NDVI, age as a timescale, sex as strata + individual level covariates (mother tongue, nationality, civil status, education, urbanization, local-SEP) + area level covariates (community and regional-SEP and unemployment rate). Dots mark HR per 10dB source-specific Lden, whiskers the corresponding 95% CI. The numerical values of the results displayed in this figure can be found in Table 3.



**Supplemental Figure S5 – HR and 95% CI for death by intentional self-harm per exposure to the number of transportation noise sources with exposure >50dB Lden**

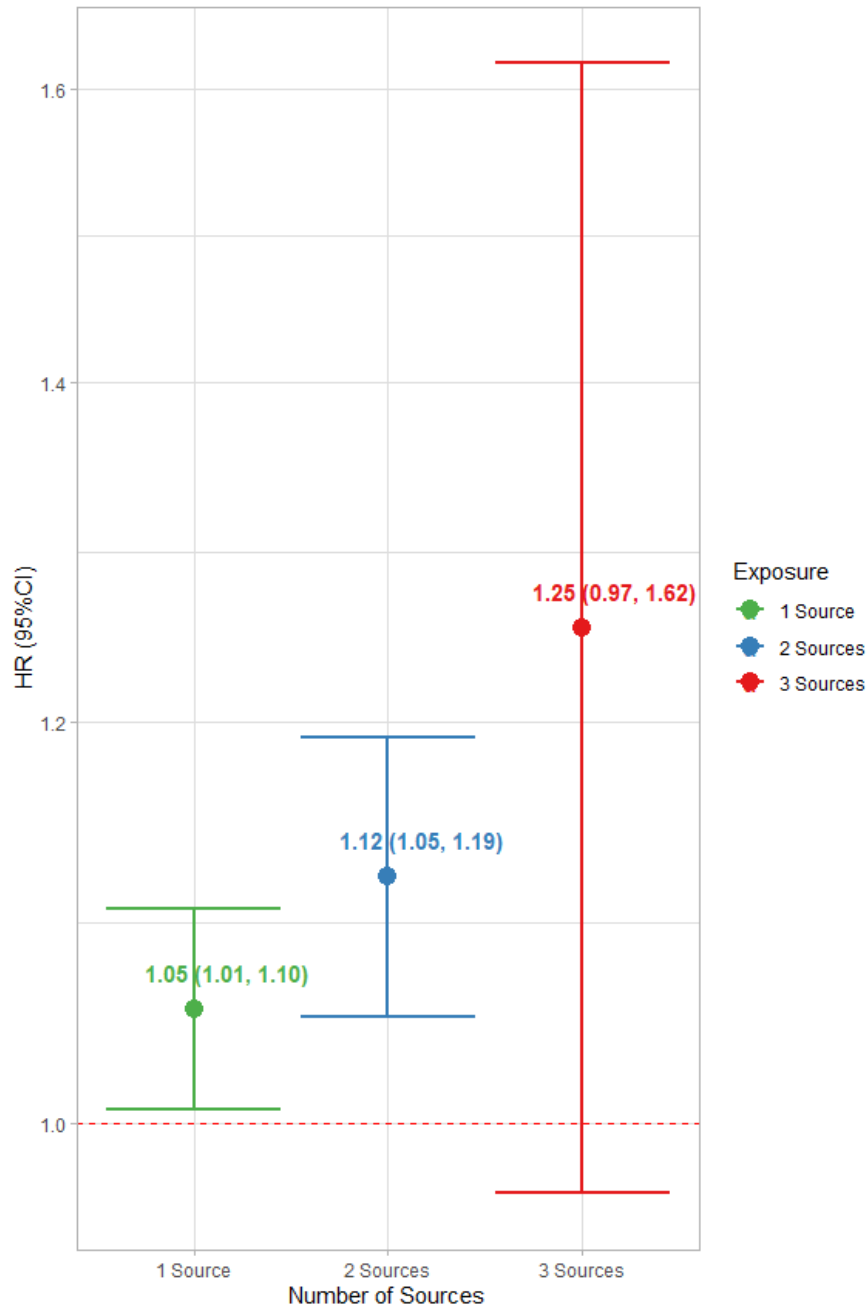

*Categorical exposure to either one, two or three different noise sources >50dB Lden (all three transportation noise sources [road traffic, railway and aircraft noise] <50dB Lden as Reference). Adjusted for PM<sub>2.5</sub>, NDVI, age as a timescale, sex as strata + individual level covariates (mother tongue, nationality, civil status, education, urbanization, local-SEP) + area level covariates (community and regional-SEP and unemployment rate). Dots mark HR, whiskers the corresponding 95% CI*

**Supplemental Figure S6 – Sensitivity Analysis comparing models adjusting for  $PM_{2.5}$  (=Model 3) versus  $NO_2$  (=Model 3b)**

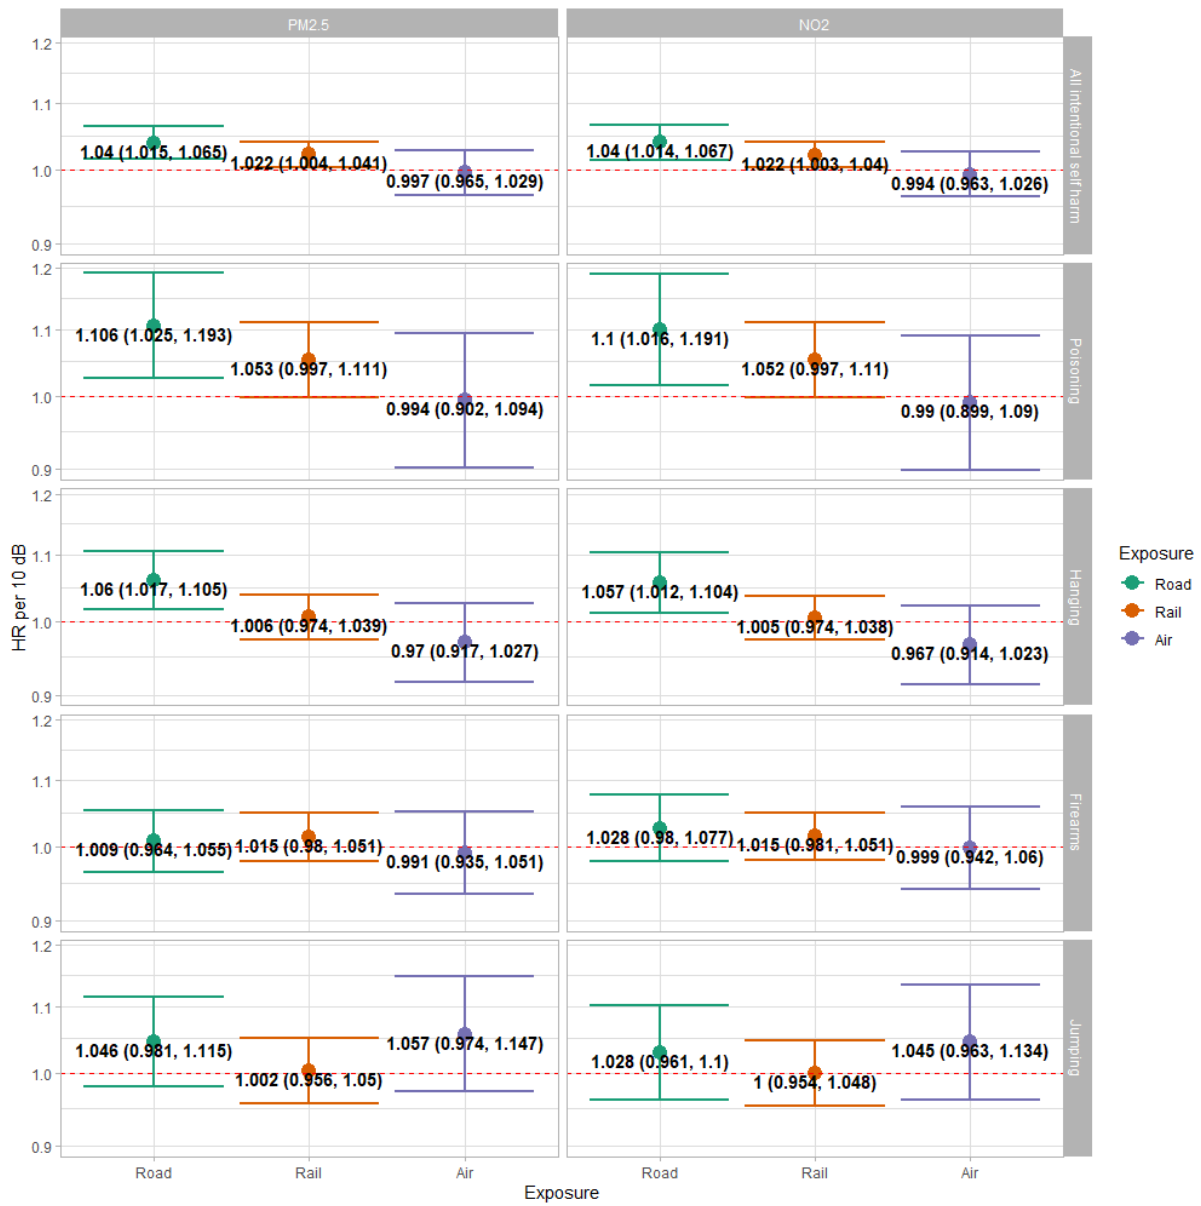

*Model 3 (main model) = road traffic, railway or aircraft noise (other two noise sources included as adjustment),  $PM_{2.5}$ , NDVI, age as a timescale, sex as strata + individual level covariates (mother tongue, nationality, civil status, education, urbanization, local-SEP) + area level covariates (community and regional-SEP and unemployment rate)*

*Model 3b= same as Model 3, adjusting for  $NO_2$  instead of  $PM_{2.5}$*

*Dots mark HR per 10dB source-specific Lden, whiskers the corresponding 95% CI. Numerical values are indicated below the dots.*

**Supplemental Figure S7 – Association between air pollution and suicide, adjusted vs. unadjusted for source-specific transportation noise and greenspace**

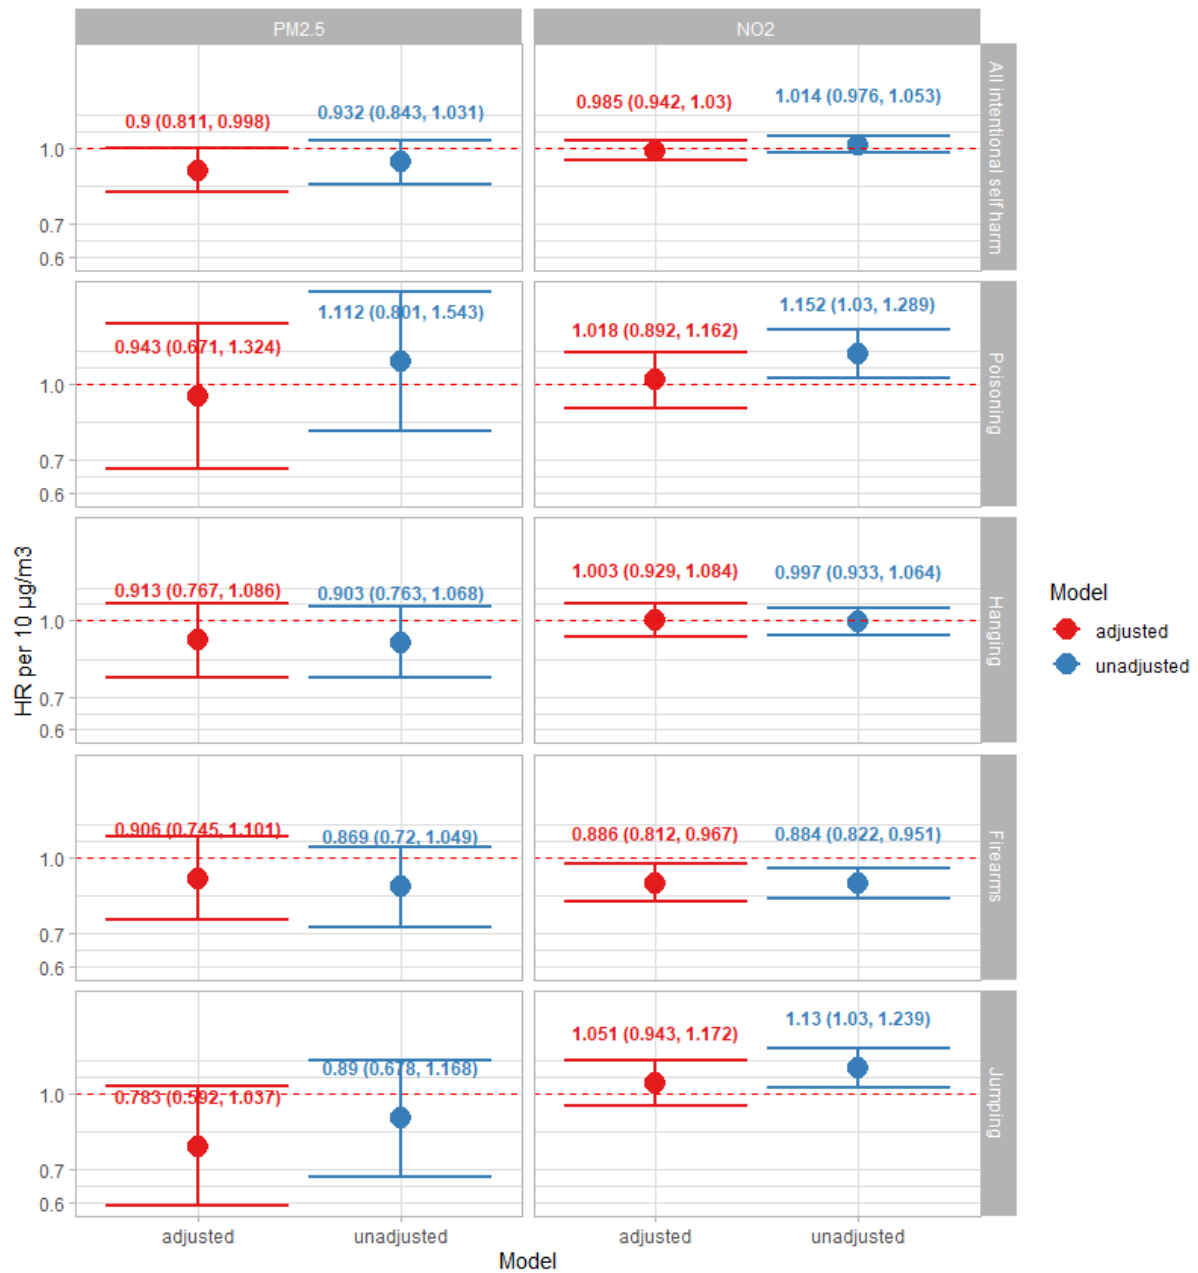

*adjusted = air pollution (either PM<sub>2.5</sub> or NO<sub>2</sub>) adjusted for road traffic, railway and aircraft noise Lden, NDVI, age as timescale, sex as strata + individual level covariates (mother tongue, nationality, civil status, education, urbanization, local-SEP) + area level covariates (community and regional-SEP and unemployment rate)*  
*unadjusted= same as adjusted, but without noise exposure and NDVI variables. Dots mark HR per 10 µg/m<sup>3</sup> PM<sub>2.5</sub>/NO<sub>2</sub>, whiskers the corresponding 95% CI.*

**Supplemental Figure S8 – Effect modification by sex: HR and 95% CI for death by specified suicide category per 10dB source-specific Lden**

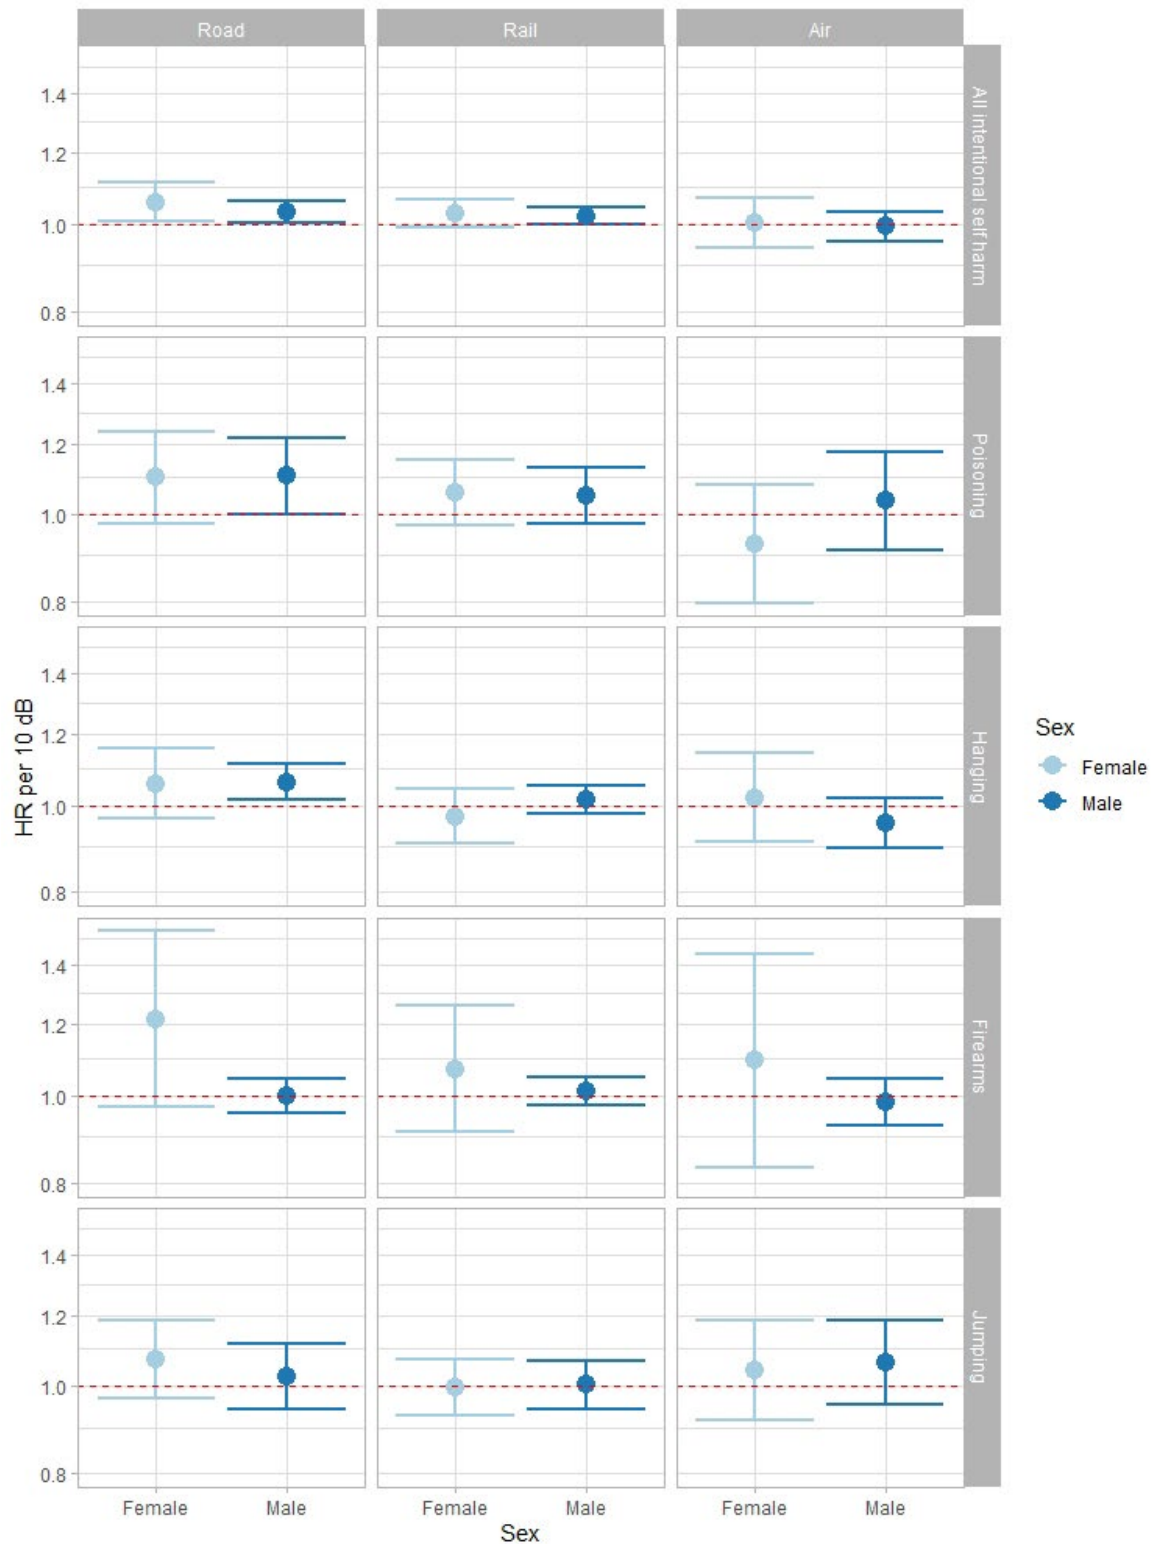

Model 3: road traffic, railway or aircraft noise (other two noise sources included as adjustment),  $PM_{2.5}$ , NDVI, age as a timescale, sex as strata + individual level covariates (mother tongue, nationality, civil status, education, urbanization, local-SEP) + area level covariates (community and regional-SEP and unemployment rate). Dots mark HR per 10dB source-specific Lden, whiskers the corresponding 95% CI. The numerical values of the results displayed in this figure can be found in Table S3.

**Supplemental Figure S9 – Effect modification by age: HR and 95% CI for death by all intentional self-harm per 10dB source-specific Lden**

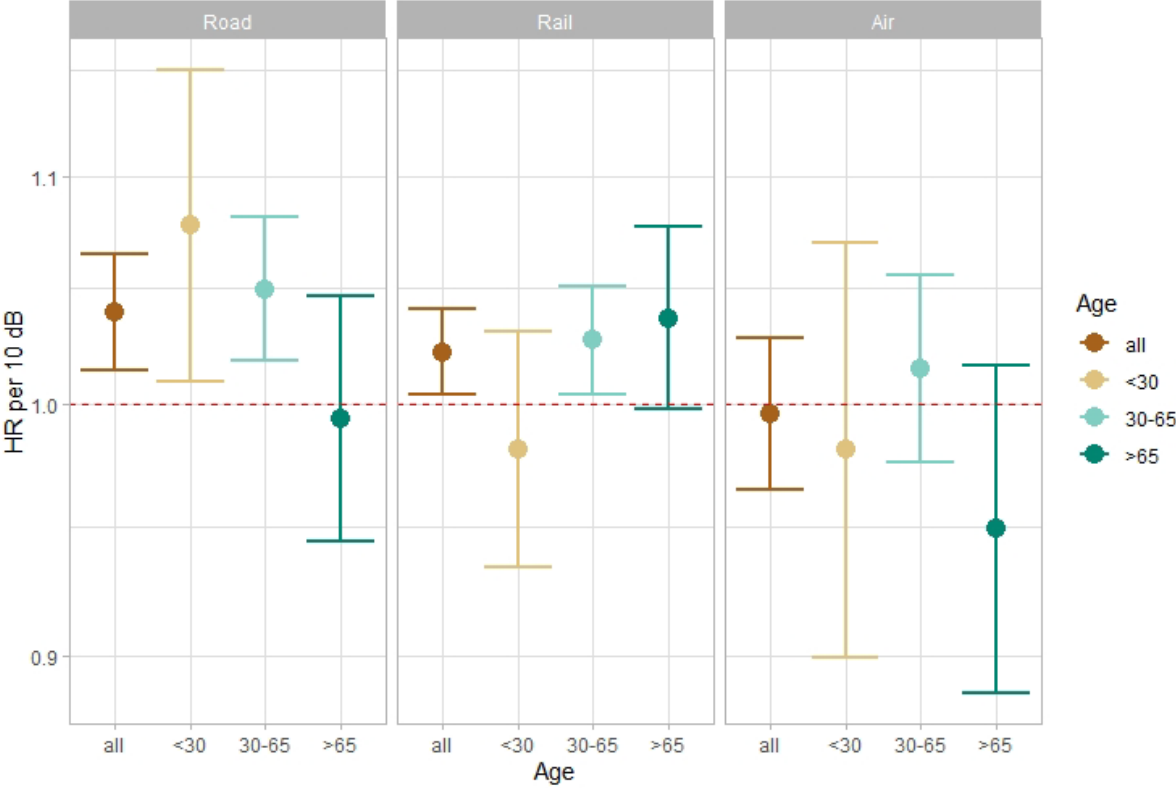

*Model 3: road traffic, railway or aircraft noise (other two noise sources included as adjustment), PM<sub>2.5</sub>, NDVI, age as a timescale, sex as strata + individual level covariates (mother tongue, nationality, civil status, education, urbanization, local-SEP) + area level covariates (community and regional-SEP and unemployment rate). Dots mark HR per 10dB source-specific Lden, whiskers the corresponding 95% CI. The numerical values of the results displayed in this figure can be found in Table S3.*

**Supplemental Figure S10 – Effect modification by local-SEP category: HR and 95% CI for death by all intentional self-harm per 10dB source-specific Lden**

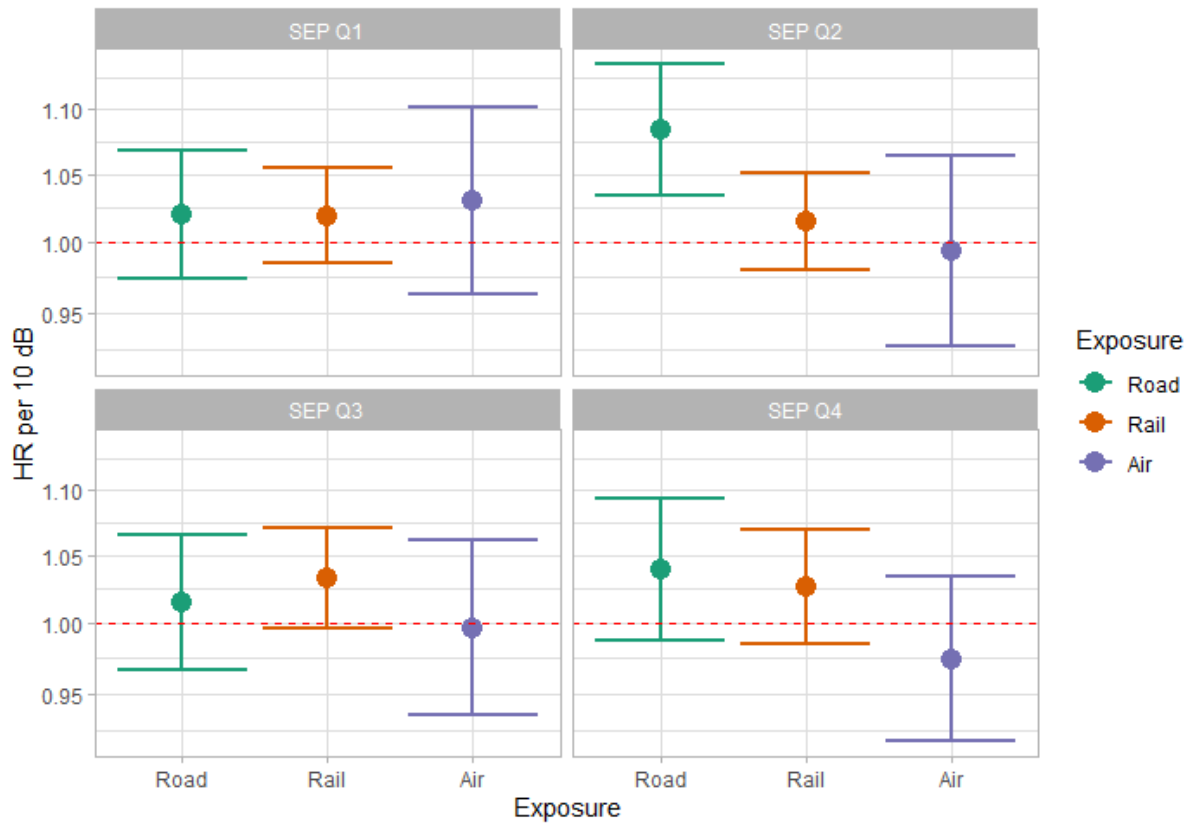

*Model 3: Stratified analysis by SEP-Quartile using the main model (M3) including noise exposures (road traffic noise, railway noise and aircraft noise, as Lden), PM2.5 exposure, NDVI, age as timescale, sex as strata, individual level covariates (civil status, education, mother tongue, nationality, urbanization) and area-SEP and unemployment rate. Dots mark HR per 10dB source-specific Lden, whiskers the corresponding 95% CI. The numerical values of the results displayed in this figure can be found in Table S6.*

**Supplemental Figure S11 – Effect modification by degree of urban: HR and 95% CI for death by all intentional self-harm per 10dB source-specific Lden / 10µg/m<sup>3</sup> PM<sub>2.5</sub> / 0.1 NDVI**

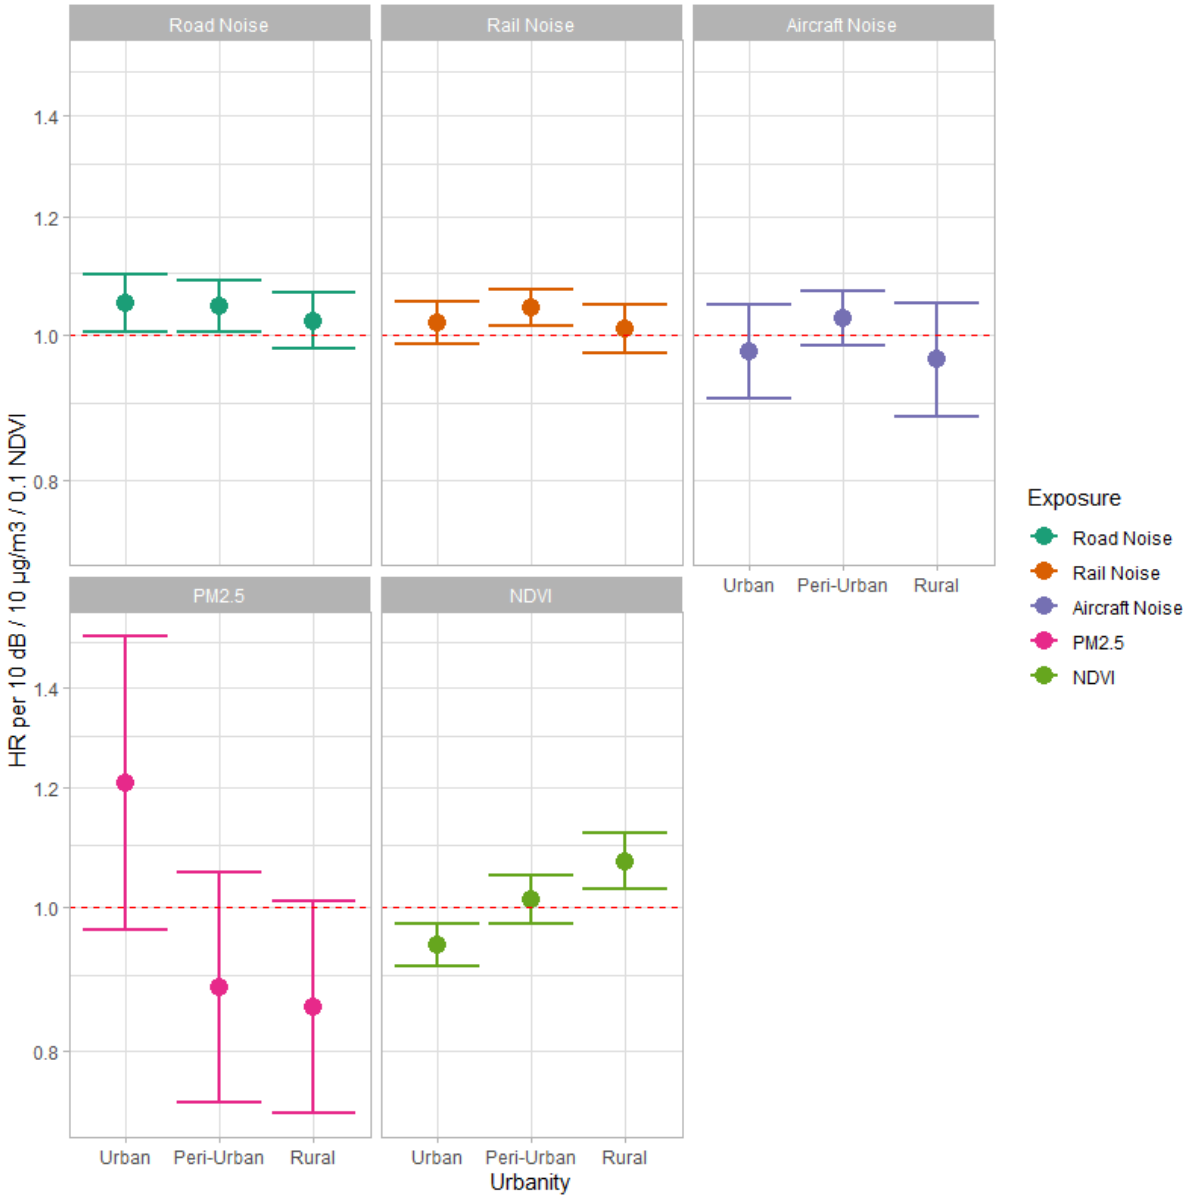

*Model 3: Stratified analysis by degree of urbanization (urban, peri-urban, rural) using the main model (M3) including noise exposures (road traffic noise, railway noise and aircraft noise, as Lden), PM<sub>2.5</sub> exposure, NDVI, age as timescale, sex as strata, individual level covariates (education, mother tongue, nationality, local-SEP) and area-SEP and unemployment rate. Dots mark HR per 10dB source-specific Lden / 10 µg/m<sup>3</sup> PM<sub>2.5</sub> / 0.1 NDVI, whiskers the corresponding 95%CI. The numerical values of the results displayed in this figure can be found in Table S8.*
