# Supplementary material
Source: PubMed Central journal article supplement (PMC10053778)
Supplement: ehp11587.smcontents.508.pdf [file ehp11587.smcontents.508.pdf]

**Note to readers with disabilities:** *EHP* strives to ensure that all journal content is accessible to all readers. However, some figures and Supplemental Material published in *EHP* articles may not conform to [508 standards](#) due to the complexity of the information being presented. If you need assistance accessing journal content, please contact [ehp508@niehs.nih.gov](mailto:ehp508@niehs.nih.gov). Our staff will work with you to assess and meet your accessibility needs within 3 working days.

### **Supplemental Material**

#### **Suicide and Transportation Noise: A Prospective Cohort Study from Switzerland**

Benedikt Wicki, Beat Schäffer, Jean Marc Wunderli, Thomas J. Müller, Charlotte Pervilhac, Martin Röösl, and Danielle Vienneau

#### **Table of Contents**

**Table S1.** Study Population Selection.

**Table S2.** Estimated HR per 10dB Lden / 10 $\mu$ g/m<sup>3</sup> PM<sub>2.5</sub> / 0.1 NDVI (95% confidence interval) for death by all intentional self-harm (ICD-10: X60-84, excluding X61.8, X61.9 and X81-82) from the different models.

**Table S3.** HR per 10dB Lden / 10 $\mu$ g/m<sup>3</sup> PM<sub>2.5</sub> / 0.1 NDVI (95% confidence interval) for the association death by specified suicide category, main model (M3).

**Table S4.** Association between eventfulness of noise at night and death from different methods of suicide. Model 4a and 4b, HR per quartile of night-time Intermittency Ratio and number of noise events (Lowest quartile as reference group).

**Table S5.** HR (95% confidence interval) for road traffic noise and PM<sub>2.5</sub> for death by all intentional self-harm (ICD-10: X60-84, excluding X61.8, X61.9 and X81-82) in categorical (quartiles) exposure models.

**Table S6.** Effect modification by Local SEP-Index, HR per 10dB Lden / 10 $\mu$ g/m<sup>3</sup> PM<sub>2.5</sub><sup>2.5</sup> / 0.1 NDVI (95% confidence interval).

**Table S7.** Effect modification by civil status, HR per 10dB Lden / 10 $\mu$ g/m<sup>3</sup> PM<sub>2.5</sub> / 0.1 NDVI (95% confidence interval).

**Table S8.** Effect modification by urbanization, HR per 10dB Lden / 10 $\mu$ g/m<sup>3</sup> PM<sub>2.5</sub> / 0.1 NDVI (95% confidence interval).

**Table S9.** HR and 95% Confidence interval at certain values of the exposure-response relationship for the association between transportation noise sources (Lden [dB]) and mortality from intentional self-harm (ICD-10: X60-84, excl. ICD-10 X61.8, X61.9, X81-82) displayed in Figure 2 in the main article.

**Figure S1.** HR and 95% CI for death by suicide involving vehicles per 10dB source-specific Lden.

**Figure S2.** Directed Acyclic Graph.

**Figure S3.** Correlation Matrix.

**Figure S4.** HR and 95% CI for death by specified suicide category per 10dB source-specific Lden.

**Figure S5.** HR and 95% CI for death by intentional self-harm per exposure to the number of transportation noise sources with exposure >50dB Lden.

**Figure S6.** Sensitivity Analysis comparing models adjusting for PM<sub>2.5</sub> (=Model 3) versus NO<sub>2</sub> (=Model 3b).

**Figure S7.** Association between air pollution and suicide, adjusted vs. unadjusted for source-specific transportation noise and greenspace.

**Figure S8.** Effect modification by sex: HR and 95% CI for death by specified suicide category per 10dB source-specific Lden.

**Figure S9.** Effect modification by age: HR and 95% CI for death by all intentional self-harm per 10dB source-specific Lden.

**Figure S10.** Effect modification by local-SEP category: HR and 95% CI for death by all intentional self-harm per 10dB source-specific Lden.

**Figure S11.** Effect modification by degree of urban: HR and 95% CI for death by all intentional self-harm per 10dB source-specific Lden / 10µg/m<sup>3</sup> PM<sub>2.5</sub> / 0.1 NDVI.
